# Supplementary material for: Overexpression of McHB7 Transcription Factor from Mesembryanthemum crystallinum Improves Plant Salt Tolerance
Source: MDPI journal article supplement (doi:10.3390/ijms23147879), 2022-07-17
Supplement: s1 [file s1]

## Supplementary Files

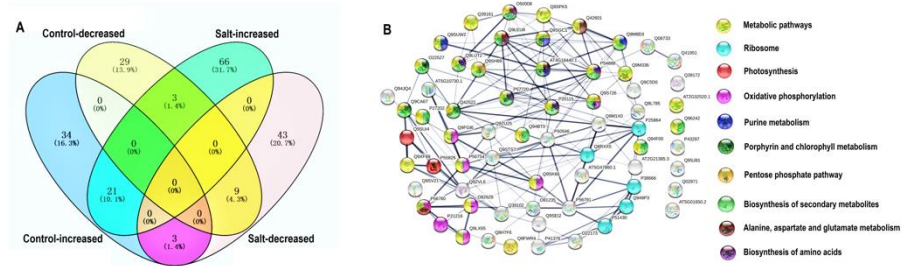

**Supplementary Figure S1.** Significantly change proteins in the OE compared to WT Arabidopsis plants. **(A)** Venn diagram of identified significantly changed proteins in the OE under control and salt stress conditions including increased and decreased proteins. **(B)** PPI prediction of significantly increased proteins in OE after salt stress by STRING.

**Supplementary Table S1.** List of proteins identified and quantified in OE and WT plants under control and salt stress conditions

(Please see data in Excel file format)

**Supplementary Table S2.** List of metabolites identified and quantified in OE and WT plants under control and salt stress conditions

(Please see data in Excel file format)

**Supplementary Table S3. KEGG pathway prediction of identified metabolites**

| KEGG pathway                                           | Total metabolites | Expected | Hits | Raw p    | Impact  |
|--------------------------------------------------------|-------------------|----------|------|----------|---------|
| Flavone and flavonol biosynthesis                      | 10                | 2.0499   | 5    | 0.03569  | 1       |
| Valine, leucine and isoleucine biosynthesis            | 22                | 4.5098   | 8    | 0.062216 | 0.22526 |
| C5-Branched dibasic acid metabolism                    | 6                 | 1.2299   | 3    | 0.10469  | 0.5     |
| Nicotinate and nicotinamide metabolism                 | 13                | 2.6649   | 5    | 0.10702  | 0.27676 |
| Aminoacyl-tRNA biosynthesis                            | 46                | 9.4295   | 13   | 0.12875  | 0.11111 |
| Arginine biosynthesis                                  | 18                | 3.6898   | 6    | 0.14412  | 0.32622 |
| Alanine, aspartate and glutamate metabolism            | 22                | 4.5098   | 7    | 0.1451   | 0.59352 |
| Monobactam biosynthesis                                | 8                 | 1.6399   | 3    | 0.21374  | 0       |
| Phenylalanine, tyrosine and tryptophan biosynthesis    | 22                | 4.5098   | 6    | 0.28674  | 0.19169 |
| Phenylpropanoid biosynthesis                           | 46                | 9.4295   | 11   | 0.33521  | 0.28998 |
| Glyoxylate and dicarboxylate metabolism                | 29                | 5.9447   | 7    | 0.38256  | 0.16723 |
| Citrate cycle (TCA cycle)                              | 20                | 4.0998   | 5    | 0.39203  | 0.24597 |
| Arginine and proline metabolism                        | 34                | 6.9697   | 8    | 0.3951   | 0.4455  |
| Tyrosine metabolism                                    | 16                | 3.2798   | 4    | 0.42193  | 0.21622 |
| Butanoate metabolism                                   | 17                | 3.4848   | 4    | 0.47234  | 0       |
| Biosynthesis of unsaturated fatty acids                | 22                | 4.5098   | 5    | 0.48119  | 0       |
| beta-Alanine metabolism                                | 18                | 3.6898   | 4    | 0.52102  | 0.0754  |
| Tryptophan metabolism                                  | 28                | 5.7397   | 6    | 0.52688  | 0.37037 |
| Glycine, serine and threonine metabolism               | 33                | 6.7647   | 7    | 0.52933  | 0.3242  |
| Purine metabolism                                      | 63                | 12.914   | 13   | 0.54115  | 0.18536 |
| Lysine biosynthesis                                    | 9                 | 1.8449   | 2    | 0.57936  | 0.2027  |
| Indole alkaloid biosynthesis                           | 4                 | 0.81996  | 1    | 0.60094  | 0       |
| Sulfur metabolism                                      | 15                | 3.0748   | 3    | 0.62154  | 0.03315 |
| Caffeine metabolism                                    | 10                | 2.0499   | 2    | 0.63991  | 0       |
| Glutathione metabolism                                 | 26                | 5.3297   | 5    | 0.64229  | 0.10211 |
| Biosynthesis of secondary metabolites - unclassified   | 5                 | 1.0249   | 1    | 0.68297  | 1       |
| Vitamin B6 metabolism                                  | 11                | 2.2549   | 2    | 0.6934   | 0.0641  |
| Sphingolipid metabolism                                | 17                | 3.4848   | 3    | 0.70945  | 0.27404 |
| Pantothenate and CoA biosynthesis                      | 23                | 4.7148   | 4    | 0.7254   | 0.12743 |
| Nitrogen metabolism                                    | 12                | 2.4599   | 2    | 0.74016  | 0       |
| Lysine degradation                                     | 18                | 3.6898   | 3    | 0.74713  | 0       |
| Biotin metabolism                                      | 18                | 3.6898   | 3    | 0.74713  | 0.25385 |
| Cutin, suberine and wax biosynthesis                   | 18                | 3.6898   | 3    | 0.74713  | 0.4375  |
| Isoquinoline alkaloid biosynthesis                     | 6                 | 1.2299   | 1    | 0.74817  | 0.5     |
| Glucosinolate biosynthesis                             | 65                | 13.324   | 11   | 0.811    | 0.09164 |
| Tropane, piperidine and pyridine alkaloid biosynthesis | 8                 | 1.6399   | 1    | 0.8412   | 0       |

|                                                       |    |        |   |         |         |
|-------------------------------------------------------|----|--------|---|---------|---------|
| Stilbenoid, diarylheptanoid and gingerol biosynthesis | 8  | 1.6399 | 1 | 0.8412  | 0.13235 |
| Histidine metabolism                                  | 15 | 3.0748 | 2 | 0.84546 | 0.10465 |
| Thiamine metabolism                                   | 22 | 4.5098 | 3 | 0.86029 | 0.06358 |
| Ascorbate and aldarate metabolism                     | 18 | 3.6898 | 2 | 0.91054 | 0       |
| Phenylalanine metabolism                              | 11 | 2.2549 | 1 | 0.92058 | 0.47059 |
| Propanoate metabolism                                 | 20 | 4.0998 | 2 | 0.93859 | 0.03259 |
| Zeatin biosynthesis                                   | 21 | 4.3048 | 2 | 0.94927 | 0       |
| Pyruvate metabolism                                   | 22 | 4.5098 | 2 | 0.95817 | 0.16731 |
| Valine, leucine and isoleucine degradation            | 37 | 7.5846 | 4 | 0.963   | 0.00991 |
| Pyrimidine metabolism                                 | 38 | 7.7896 | 4 | 0.9685  | 0.14389 |
| Flavonoid biosynthesis                                | 47 | 9.6345 | 5 | 0.97769 | 0.02471 |
| alpha-Linolenic acid metabolism                       | 28 | 5.7397 | 2 | 0.98726 | 0       |
| Cyanoamino acid metabolism                            | 29 | 5.9447 | 2 | 0.9896  | 0       |
| Terpenoid backbone biosynthesis                       | 30 | 6.1497 | 2 | 0.99151 | 0.05267 |
| Cysteine and methionine metabolism                    | 46 | 9.4295 | 4 | 0.99182 | 0.20463 |
| Glycerolipid metabolism                               | 21 | 4.3048 | 1 | 0.99221 | 0.00426 |
| Carbon fixation in photosynthetic organisms           | 21 | 4.3048 | 1 | 0.99221 | 0.03607 |
| Starch and sucrose metabolism                         | 22 | 4.5098 | 1 | 0.99383 | 0.13619 |
| Fatty acid elongation                                 | 23 | 4.7148 | 1 | 0.99511 | 0       |
| Glycolysis / Gluconeogenesis                          | 26 | 5.3297 | 1 | 0.99757 | 0.12036 |
| Glycerophospholipid metabolism                        | 37 | 7.5846 | 2 | 0.99802 | 0.08348 |
| Folate biosynthesis                                   | 27 | 5.5347 | 1 | 0.99808 | 0.02624 |
| Galactose metabolism                                  | 27 | 5.5347 | 1 | 0.99808 | 0.07998 |
| Ubiquinone and other terpenoid-quinone biosynthesis   | 38 | 7.7896 | 2 | 0.99839 | 0.00097 |
| Inositol phosphate metabolism                         | 28 | 5.7397 | 1 | 0.99848 | 0       |
| Fatty acid biosynthesis                               | 56 | 11.479 | 3 | 0.99974 | 0.01123 |
| Porphyrin and chlorophyll metabolism                  | 48 | 9.8395 | 2 | 0.99981 | 0.02926 |
| Fatty acid degradation                                | 37 | 7.5846 | 1 | 0.99982 | 0       |
| Carotenoid biosynthesis                               | 43 | 8.8146 | 1 | 0.99996 | 0.00632 |

**Supplementary Table S4. KEGG pathway prediction of increased metabolites.**

|                                                     | Total metabolites | Expected | Hits | Raw p    | -log10(p) | Impact  |
|-----------------------------------------------------|-------------------|----------|------|----------|-----------|---------|
| Purine metabolism                                   | 63                | 4.4606   | 9    | 0.029644 | 1.5281    | 0.17173 |
| Aminoacyl-tRNA biosynthesis                         | 46                | 3.2569   | 6    | 0.10105  | 0.99544   | 0.11111 |
| Lysine degradation                                  | 18                | 1.2744   | 3    | 0.12964  | 0.88726   | 0       |
| Arginine biosynthesis                               | 18                | 1.2744   | 3    | 0.12964  | 0.88726   | 0.18641 |
| Glyoxylate and dicarboxylate metabolism             | 29                | 2.0533   | 4    | 0.1441   | 0.84134   | 0.0781  |
| Alanine, aspartate and glutamate metabolism         | 22                | 1.5577   | 3    | 0.20038  | 0.69815   | 0.51798 |
| Nitrogen metabolism                                 | 12                | 0.84963  | 2    | 0.20657  | 0.68493   | 0       |
| Nicotinate and nicotinamide metabolism              | 13                | 0.92043  | 2    | 0.23348  | 0.63176   | 0.0202  |
| Glutathione metabolism                              | 26                | 1.8409   | 3    | 0.27804  | 0.5559    | 0.05046 |
| Tyrosine metabolism                                 | 16                | 1.1328   | 2    | 0.31477  | 0.50201   | 0       |
| Tryptophan metabolism                               | 28                | 1.9825   | 3    | 0.31803  | 0.49753   | 0.01852 |
| Butanoate metabolism                                | 17                | 1.2036   | 2    | 0.34159  | 0.4665    | 0       |
| C5-Branched dibasic acid metabolism                 | 6                 | 0.42481  | 1    | 0.35685  | 0.44752   | 0       |
| Ascorbate and aldarate metabolism                   | 18                | 1.2744   | 2    | 0.36808  | 0.43406   | 0       |
| beta-Alanine metabolism                             | 18                | 1.2744   | 2    | 0.36808  | 0.43406   | 0.0754  |
| Glycine, serine and threonine metabolism            | 33                | 2.3365   | 3    | 0.41764  | 0.3792    | 0.30168 |
| Citrate cycle (TCA cycle)                           | 20                | 1.416    | 2    | 0.41975  | 0.37701   | 0.11571 |
| Monobactam biosynthesis                             | 8                 | 0.56642  | 1    | 0.44507  | 0.35157   | 0       |
| Thiamine metabolism                                 | 22                | 1.5577   | 2    | 0.46924  | 0.32861   | 0.06358 |
| Valine, leucine and isoleucine biosynthesis         | 22                | 1.5577   | 2    | 0.46924  | 0.32861   | 0.10727 |
| Lysine biosynthesis                                 | 9                 | 0.63722  | 1    | 0.48457  | 0.31464   | 0       |
| Pantothenate and CoA biosynthesis                   | 23                | 1.6285   | 2    | 0.49304  | 0.30712   | 0.12743 |
| Caffeine metabolism                                 | 10                | 0.70802  | 1    | 0.52129  | 0.28292   | 0       |
| Flavone and flavonol biosynthesis                   | 10                | 0.70802  | 1    | 0.52129  | 0.28292   | 0.35    |
| Vitamin B6 metabolism                               | 11                | 0.77883  | 1    | 0.55541  | 0.25538   | 0.03205 |
| Riboflavin metabolism                               | 11                | 0.77883  | 1    | 0.55541  | 0.25538   | 0.06667 |
| Cysteine and methionine metabolism                  | 46                | 3.2569   | 3    | 0.64523  | 0.19029   | 0.13971 |
| Histidine metabolism                                | 15                | 1.062    | 1    | 0.66943  | 0.17429   | 0       |
| Sulfur metabolism                                   | 15                | 1.062    | 1    | 0.66943  | 0.17429   | 0       |
| Arginine and proline metabolism                     | 34                | 2.4073   | 2    | 0.70775  | 0.15012   | 0.1371  |
| Sphingolipid metabolism                             | 17                | 1.2036   | 1    | 0.71504  | 0.14567   | 0       |
| Zeatin biosynthesis                                 | 21                | 1.4869   | 1    | 0.78839  | 0.10326   | 0       |
| Carbon fixation in photosynthetic organisms         | 21                | 1.4869   | 1    | 0.78839  | 0.10326   | 0.03607 |
| Phenylalanine, tyrosine and tryptophan biosynthesis | 22                | 1.5577   | 1    | 0.80359  | 0.094967  | 0.09009 |

|                                      |    |        |   |         |          |         |
|--------------------------------------|----|--------|---|---------|----------|---------|
| Starch and sucrose metabolism        | 22 | 1.5577 | 1 | 0.80359 | 0.094967 | 0.10163 |
| Pyruvate metabolism                  | 22 | 1.5577 | 1 | 0.80359 | 0.094967 | 0.16731 |
| Glucosinolate biosynthesis           | 65 | 4.6022 | 3 | 0.85358 | 0.068756 | 0.08933 |
| Glycolysis / Gluconeogenesis         | 26 | 1.8409 | 1 | 0.8543  | 0.068391 | 0.12036 |
| Flavonoid biosynthesis               | 47 | 3.3277 | 2 | 0.85908 | 0.065967 | 0.00087 |
| Folate biosynthesis                  | 27 | 1.9117 | 1 | 0.8648  | 0.063086 | 0.02624 |
| Galactose metabolism                 | 27 | 1.9117 | 1 | 0.8648  | 0.063086 | 0.07998 |
| alpha-Linolenic acid metabolism      | 28 | 1.9825 | 1 | 0.87455 | 0.058217 | 0       |
| Cyanoamino acid metabolism           | 29 | 2.0533 | 1 | 0.8836  | 0.053744 | 0       |
| Terpenoid backbone biosynthesis      | 30 | 2.1241 | 1 | 0.89201 | 0.049632 | 0       |
| Glycerophospholipid metabolism       | 37 | 2.6197 | 1 | 0.93619 | 0.028635 | 0.05273 |
| Pyrimidine metabolism                | 38 | 2.6905 | 1 | 0.94082 | 0.026491 | 0       |
| Porphyrin and chlorophyll metabolism | 48 | 3.3985 | 1 | 0.97224 | 0.012227 | 0       |

**Supplementary Table S5.** Information of primers used in this study.

| Primer Name | Primer sequence (5'-3')                                                                                                                       | Purpose                                                                         |
|-------------|-----------------------------------------------------------------------------------------------------------------------------------------------|---------------------------------------------------------------------------------|
| F1          | ATGATGTATGAAGAAGGAGAA                                                                                                                         | For the cloning of <i>McHB7</i>                                                 |
| R1          | CGACCAAATTTCCCAACCATTG                                                                                                                        |                                                                                 |
| F2          | CGCGGATCCATGATGTATGAAGAAGGAGAA                                                                                                                | To ligate <i>McHB7</i> to the plant binary expression vector <i>pCAMBIA1300</i> |
| R2          | CGGTCTAGATCAGGCGCCTTTGTCATCGTCATCCTT<br>GTAGTCTCCGCCTTTATCGTCATCGTCTTTATAATCT<br>CCGCCTTTGTCATCGTCATCCTTGTAGTCTCCGCC<br>GACCAAATTTCCCAACCATTG |                                                                                 |
